# Supplementary material
Source: PubMed Central journal article supplement (PMC6459052)

## Supplementary Online Content

Sun, A, Wu, C, Wong, SJ, et al. Prophylactic cranial irradiation vs observation in patients with locally advanced non–small cell lung cancer: a long-term update of the NRG Oncology/RTOG 0214 phase 3 randomized clinical trial. *JAMA Oncol*. Published online March 14, 2019.

doi:10.1001/jamaoncol.2018.7220

**eTable 1.** Cox proportional hazard multivariable analysis results, for no prior surgery subset

**eTable 2.** Cox proportional hazard multivariate analysis results, for prior surgery subset

**eTable 3.** Outcome estimates, by histology

**eFigure 1.** Cumulative Incidences of First Failures by Event Types

This supplementary material has been provided by the authors to give readers additional information about their work.

**eTable 1: Cox proportional hazard multivariable analysis results, for no prior surgery subset.**

| Covariate     | Comparison                     | Overall survival  |         | Disease-free survival |         | Brain metastasis  |         |
|---------------|--------------------------------|-------------------|---------|-----------------------|---------|-------------------|---------|
|               |                                | HR (95% CI)       | p-value | HR (95% CI)           | p-value | HR (95% CI)       | p-value |
| Treatment arm | PCI vs. Observation (RL)       | 0.73 (0.54, 0.98) | 0.04    | 0.70 (0.52, 0.93)     | 0.01    | 0.34 (0.17, 0.68) | 0.002   |
| Age           | >= 60 vs. < 60 (RL)            | 1.15 (0.85, 1.56) | 0.36    | 0.92 (0.68, 1.23)     | 0.55    | 0.45 (0.24, 0.84) | 0.01    |
| Zubrod        | > 0 vs. 0 (RL)                 | 1.47 (1.08, 1.99) | 0.01    | 1.21 (0.90, 1.62)     | 0.20    | 0.73 (0.36, 1.45) | 0.36    |
| AJCC Stage    | IIIB vs. IIIA (RL)             | 0.97 (0.73, 1.30) | 0.86    | 1.02 (0.77, 1.35)     | 0.90    | 0.61 (0.32, 1.14) | 0.12    |
| Histology     | Squamous vs. Non-squamous (RL) | 1.08 (0.79, 1.47) | 0.63    | 1.00 (0.74, 1.34)     | 0.99    | 0.20 (0.08, 0.53) | 0.001   |

**eTable 2: Cox proportional hazard multivariate analysis results, for prior surgery subset.**

| Covariate     | Comparison                     | Overall survival  |         | Disease-free survival |         | Brain metastasis  |         |
|---------------|--------------------------------|-------------------|---------|-----------------------|---------|-------------------|---------|
|               |                                | HR (95% CI)       | p-value | HR (95% CI)           | p-value | HR (95% CI)       | p-value |
| Treatment arm | PCI vs. Observation (RL)       | 0.97 (0.63, 1.51) | 0.91    | 0.88 (0.58, 1.35)     | 0.56    | 0.71 (0.27, 1.88) | 0.49    |
| Age           | >= 60 vs. < 60 (RL)            | 1.77 (1.13, 2.78) | 0.01    | 1.50 (0.98, 2.29)     | 0.06    | 0.77 (0.29, 2.03) | 0.59    |
| Zubrod        | > 0 vs. 0 (RL)                 | 1.24 (0.81, 1.90) | 0.32    | 1.18 (0.78, 1.78)     | 0.43    | 1.67 (0.65, 4.32) | 0.29    |
| AJCC Stage    | IIIB vs. IIIA (RL)             | 1.66 (1.06, 2.59) | 0.03    | 1.75 (1.13, 2.69)     | 0.01    | 1.90 (0.73, 4.92) | 0.19    |
| Histology     | Squamous vs. Non-squamous (RL) | 1.01 (0.64, 1.59) | 0.96    | 1.00 (0.65, 1.53)     | 0.99    | 0.11 (0.02, 0.85) | 0.03    |

| <b>eTable 3: Outcome estimates, by histology</b> |                      |                    |            |                      |                    |            |           |
|--------------------------------------------------|----------------------|--------------------|------------|----------------------|--------------------|------------|-----------|
| Outcome by time                                  | No. at Risk          | Event estimate (%) | 95% CI (%) | No. at Risk          | Event estimate (%) | 95% CI (%) | p-value * |
| <b>Non-Squamous</b>                              |                      |                    |            |                      |                    |            |           |
|                                                  | PCI (n=112)          |                    |            | Observation (n=113)  |                    |            |           |
| Overall survival                                 |                      |                    |            |                      |                    |            |           |
| 2 years                                          | 66                   | 59.5               | 49.7, 67.9 | 64                   | 57.7               | 48.0, 66.3 | 0.11      |
| 5 years                                          | 26                   | 23.8               | 16.4, 32.1 | 27                   | 25.9               | 18.1, 34.5 |           |
| 10 years                                         | 10                   | 18.2               | 11.6, 26.0 | 6                    | 13.3               | 7.2, 21.3  |           |
| MST (95% CI)                                     | 2.5 years (2.0, 3.1) |                    |            | 2.2 years (1.8, 2.9) |                    |            |           |
| No. of events                                    | 90                   |                    |            | 93                   |                    |            |           |
| HR of PCI vs. obs. (95% CI) §                    | 0.77 (0.56, 1.06)    |                    |            |                      |                    |            |           |
|                                                  |                      |                    |            |                      |                    |            |           |
| Disease-free Survival                            |                      |                    |            |                      |                    |            |           |
| 2 years                                          | 43                   | 38.8               | 29.8, 47.7 | 36                   | 32.5               | 24.0, 41.3 | 0.039     |
| 5 years                                          | 19                   | 17.6               | 11.1, 25.3 | 16                   | 16.3               | 10.1, 24.0 |           |
| 10 years                                         | 7                    | 13.0               | 7.5, 20.0  | 4                    | 8.6                | 3.8, 15.8  |           |
| MST (95% CI)                                     | 1.4 years (1.0, 1.6) |                    |            | 1.0 years (0.7, 1.3) |                    |            |           |
| No. of events                                    | 97                   |                    |            | 99                   |                    |            |           |
| HR of PCI vs. obs. (95% CI) §                    | 0.72 (0.53, 0.98)    |                    |            |                      |                    |            |           |
|                                                  |                      |                    |            |                      |                    |            |           |
| CNS metastasis                                   |                      |                    |            |                      |                    |            |           |
| 2 years                                          | 62                   | 14.4               | 8.7, 23.2  | 54                   | 32.1               | 23.8, 42.4 | 0.005     |
| 5 years                                          | 26                   | 22.2               | 14.0, 34.0 | 22                   | 37.7               | 28.2, 49.3 |           |
| 10 years                                         | 10                   | 22.2               | 14.0, 34.0 | 6                    | 37.7               | 28.2, 49.3 |           |
| MST (95% CI)                                     | Not reached          |                    |            | Not reached          |                    |            |           |
| No. of events                                    | 19                   |                    |            | 35                   |                    |            |           |
| HR of PCI vs. obs. (95% CI) §                    | 0.43 (0.24, 0.78)    |                    |            |                      |                    |            |           |
|                                                  |                      |                    |            |                      |                    |            |           |

| <b>eTable 3: Outcome estimates, by histology (continued)</b> |                      |                    |            |                      |                    |            |           |
|--------------------------------------------------------------|----------------------|--------------------|------------|----------------------|--------------------|------------|-----------|
| Outcome by time                                              | No. at Risk          | Event estimate (%) | 95% CI (%) | No. at Risk          | Event estimate (%) | 95% CI (%) | p-value * |
| <b>Squamous</b>                                              |                      |                    |            |                      |                    |            |           |
|                                                              | PCI (n=51)           |                    |            | Observation (n=64)   |                    |            |           |
| Overall survival                                             |                      |                    |            |                      |                    |            | 0.68      |
| 2 years                                                      | 24                   | 49.1               | 34.6, 62.1 | 27                   | 44.8               | 32.3, 56.5 |           |
| 5 years                                                      | 13                   | 26.6               | 15.2, 39.4 | 15                   | 26.1               | 15.8, 37.6 |           |
| 10 years                                                     | 5                    | 16.1               | 7.4, 27.8  | 5                    | 13.4               | 6.1, 23.6  |           |
| MST (95% CI)                                                 | 2.0 years (1.3, 3.1) |                    |            | 1.8 (1.2, 2.9)       |                    |            |           |
| No. of events                                                | 41                   |                    |            | 53                   |                    |            |           |
| HR of PCI vs. obs. (95% CI) §                                | 0.91 (0.58, 1.42)    |                    |            |                      |                    |            |           |
| Disease-free Survival                                        |                      |                    |            |                      |                    |            | 0.39      |
| 2 years                                                      | 15                   | 30.0               | 18.1, 42.9 | 19                   | 29.7%              | 19.1, 41.1 |           |
| 5 years                                                      | 11                   | 22.0               | 11.8, 34.2 | 10                   | 15.6%              | 8.0, 25.5  |           |
| 10 years                                                     | 3                    | 11.7               | 4.6, 22.4  | 3                    | 5.9                | 1.7, 13.7  |           |
| MST (95% CI)                                                 | 1.3 (0.7, 1.6)       |                    |            | 1.0 years (0.7, 1.4) |                    |            |           |
| No. of events                                                | 44                   |                    |            | 60                   |                    |            |           |
| HR of PCI vs. obs. (95% CI) §                                | 0.83 (0.54, 1.27)    |                    |            |                      |                    |            |           |
| CNS metastasis¶                                              |                      |                    |            |                      |                    |            |           |
| 2 years                                                      | 24                   | 2.0%               | 0.3, 13.1  | 27                   | 8.5%               | 3.6, 19.2  |           |
| No. of events                                                | 1                    |                    |            | 5                    |                    |            |           |

\* From stratified log-rank test, stratified by AJCC Stage (IIIA vs. IIIB); Prior surgery (No vs. Yes) and Zubrod performance status (0 vs. >0).

§ From stratified Cox proportional hazard model, stratified by AJCC Stage (IIIA vs. IIIB); Prior surgery (No vs. Yes) and Zubrod performance status (0 vs. >0).

¶ The number of events is insufficient for meaningful analysis.

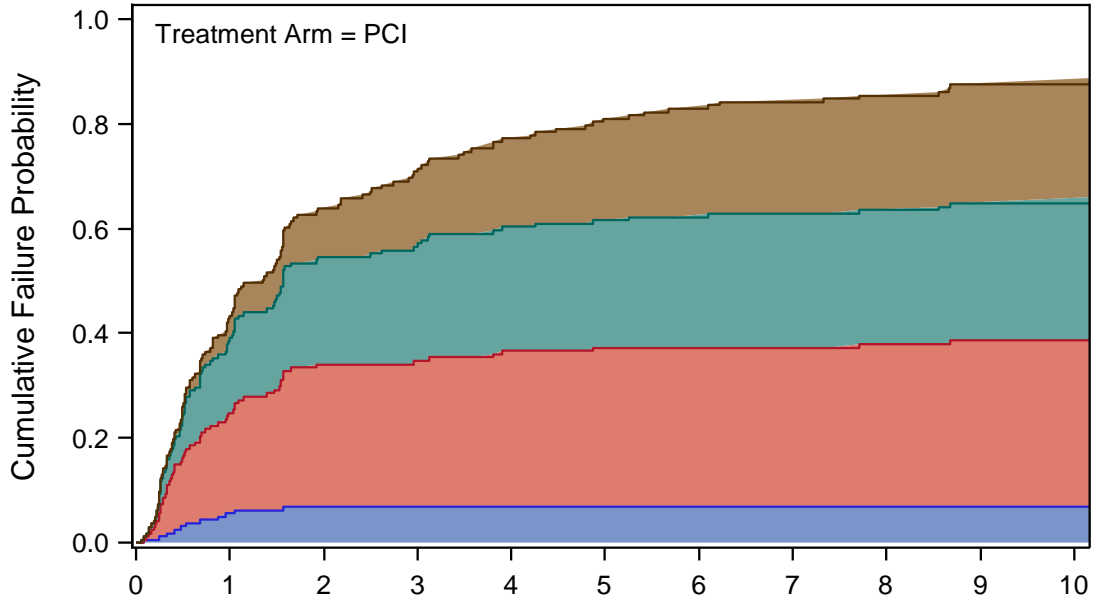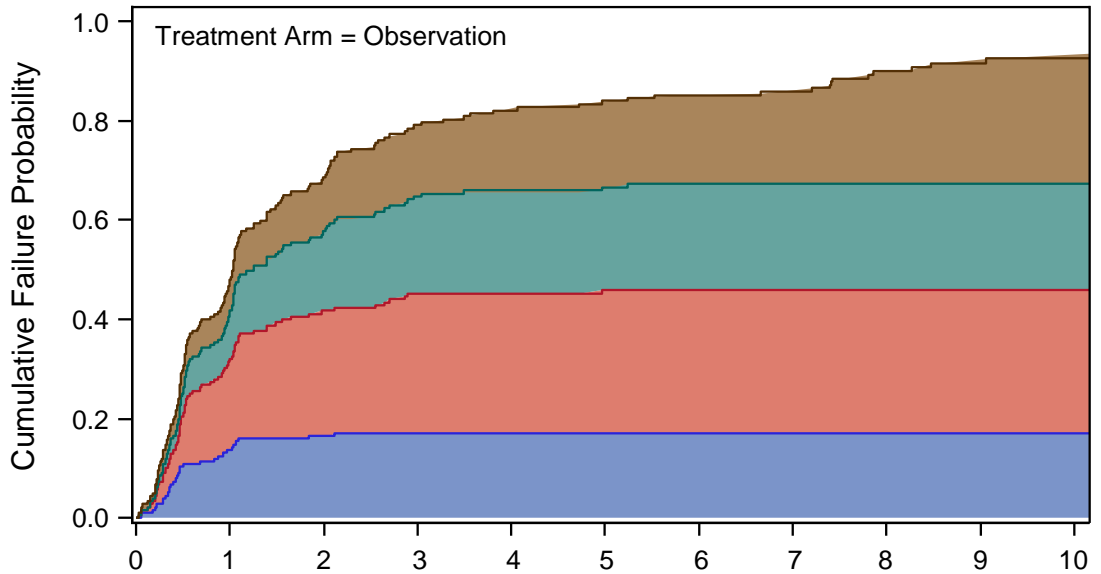

Time Since Randomization (Years)

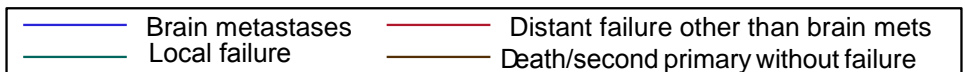

Supplement: jamaoncol-5-847-s002.pdf [file jamaoncol-5-847-s002.pdf]
