# Supplementary material
Source: PubMed Central journal article supplement (PMC6459052)
Supplement: jamaoncol-5-847-s003.pdf [file jamaoncol-5-847-s003.pdf]

## **Data Sharing Statement**

Sun. Prophylactic Cranial Irradiation vs Observation in Patients With Locally Advanced Non-Small Cell Lung Cancer. *JAMA Oncol.* Published March 14, 2019. 10.1001/jamaoncol.2018.7220

### **Data**

**Data available:** No
